# Supplementary material for: Stratification of tumour cell radiation response and metabolic signatures visualization with Raman spectroscopy and explainable convolutional neural network
Source: Royal Society of Chemistry journal article supplement (doi:10.1039/d3an01797d), 2024-01-01
Supplement: d3an01797d1.pdf [file d3an01797d1.pdf]

# Stratification of tumour cell radiation response and metabolic signatures visualization with Raman spectroscopy and explainable Convolutional Neural Network

**Alejandra M. Fuentes<sup>1</sup>, Kirsty Milligan<sup>1</sup>, Mitchell Wiebe<sup>1</sup>, Apurva Narayan<sup>2,3</sup>, Julian J. Lum<sup>4,5</sup>, Alexandre G. Brolo<sup>6</sup>, Jeffrey L. Andrews<sup>7</sup>, and Andrew Jirasek<sup>1,\*</sup>**

<sup>1</sup>Department of Physics, The University of British Columbia Okanagan Campus, Kelowna, Canada

<sup>2</sup>Department of Computer Science, Western University, London, Canada

<sup>3</sup>Department of Computer Science, The University of British Columbia Okanagan Campus, Kelowna, Canada

<sup>4</sup>Department of Biochemistry and Microbiology, The University of Victoria, Victoria, Canada

<sup>5</sup>Trev and Joyce Deeley Research Centre, BC Cancer, Victoria, Canada

<sup>6</sup>Department of Chemistry, The University of Victoria, Victoria, Canada

<sup>7</sup>Department of Statistics, The University of British Columbia Okanagan Campus, Kelowna, Canada

\*andrew.jirasek@ubc.ca

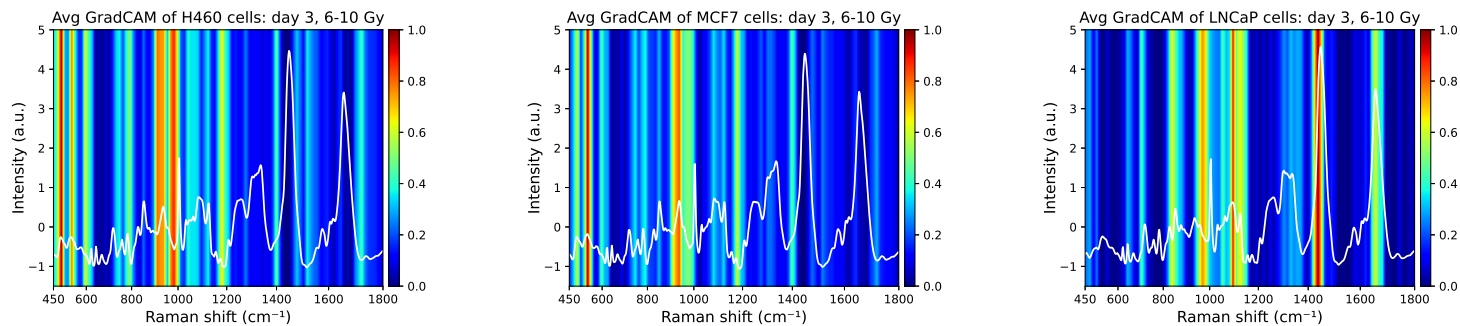

(a) Convolution filter numbers: 64 (first layer, stride 2), 64 (second layer, stride 3); filter size 7x1; 10-neuron fully connected layer before classification layer.

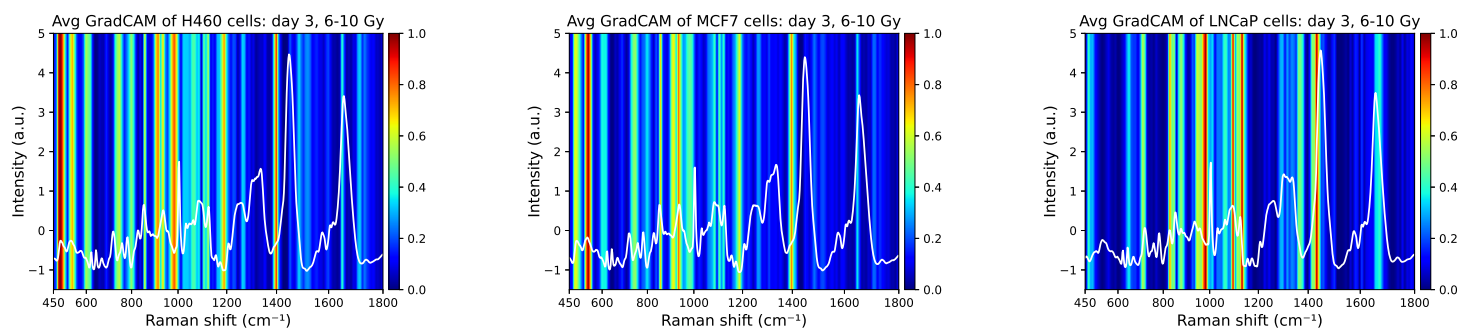

(b) Convolution filter numbers: 64 (first layer, stride 2), 64 (second layer, stride 2); filter size 5x1.

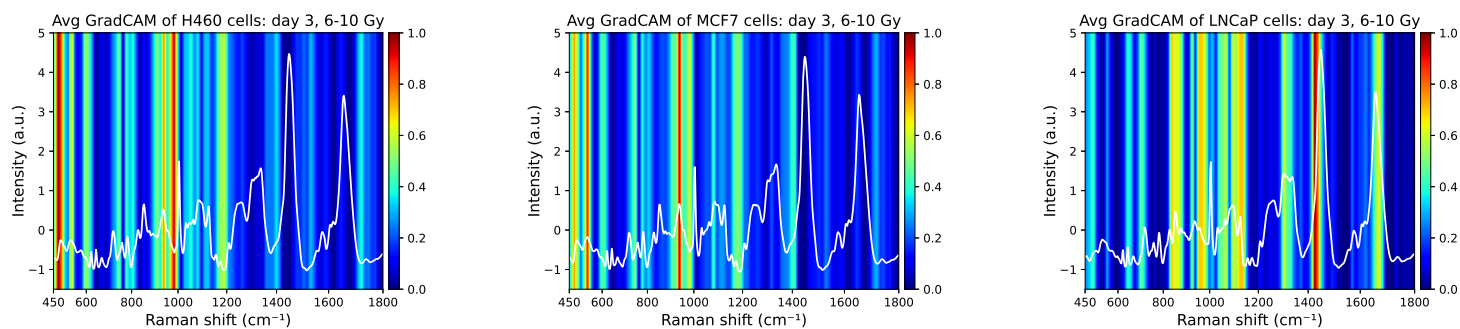

(c) Convolution filter numbers: 32 (first layer, stride 2), 32 (second layer, stride 3); filter size 6x1.

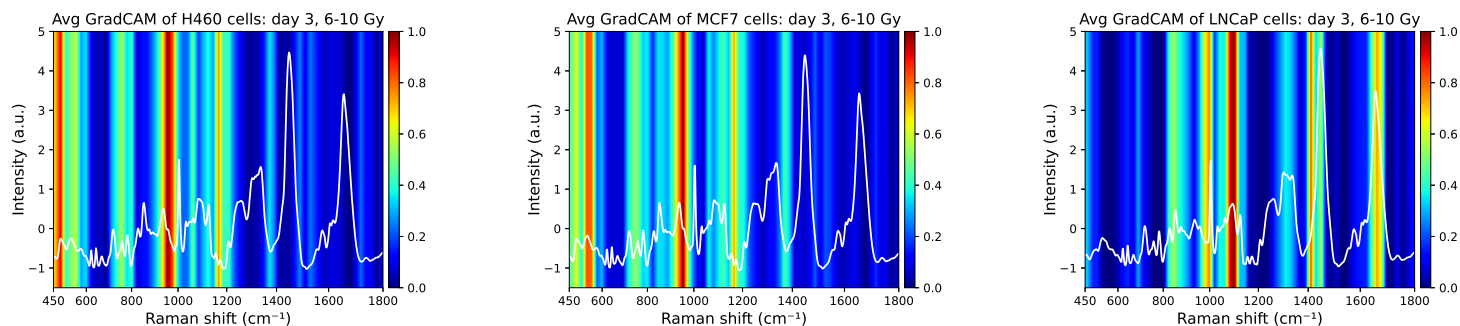

(d) Convolution filter numbers: 64 (first layer, stride 3), 128 (second layer, stride 3); filter size 7x1.

**Figure S1.** Grad-CAM saliency maps of H460, MCF7, and LNCaP cell Raman spectra exposed to single-fraction doses ranging 6-10 Gy and collected 3 days post-irradiation for four different CNN architectures, showing consistency in active peaks.

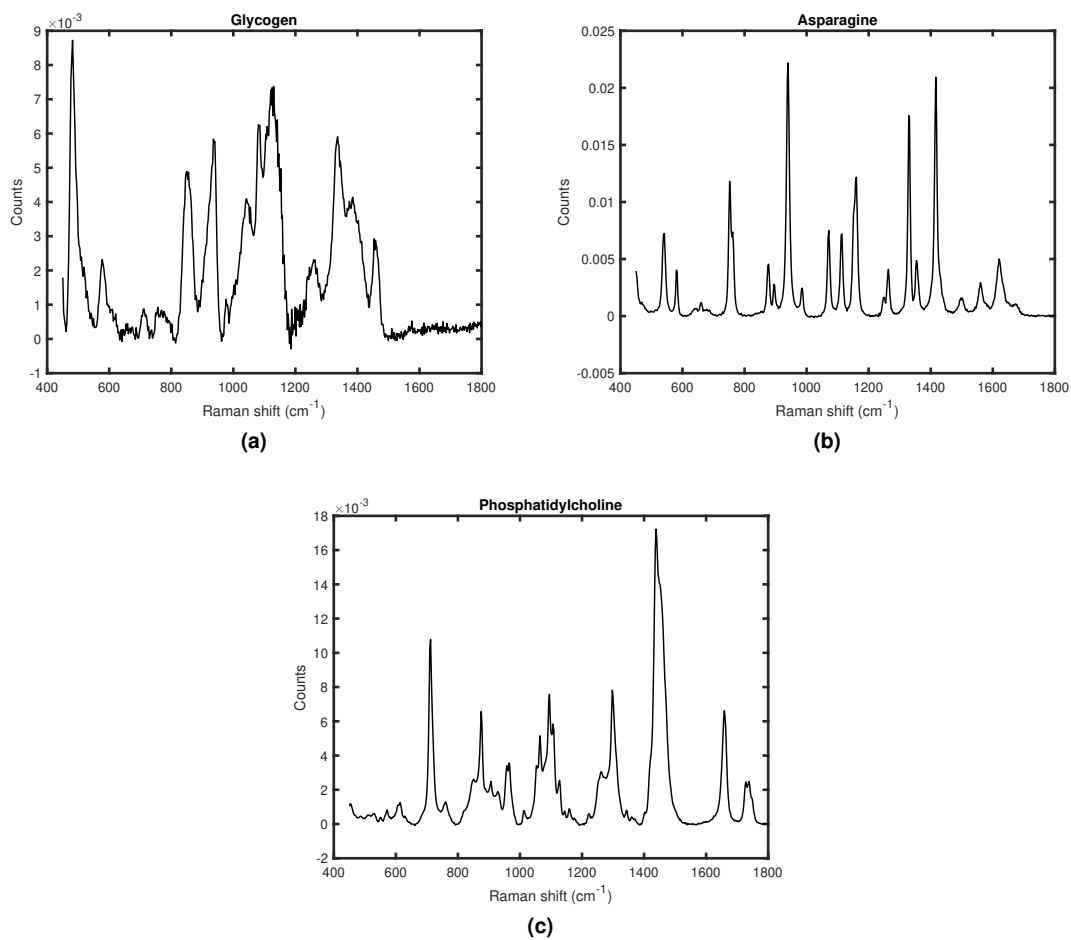

**Figure S2.** Raman spectra of (a)glycogen, (b)asparagine, and (c) phosphatidylcholine.
